# Supplementary material for: Evidence of the CH···O HydrogenBonding in Imidazolium-Based Ionic Liquids from Far-Infrared Spectroscopy Measurements and DFT Calculations
Source: MDPI journal article supplement (doi:10.3390/ijms22116155), 2021-06-07
Supplement: s1 [file s1]

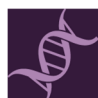

# Evidence of the CH $\cdots$ O hydrogen bonding in imidazolium based ionic liquids from far-infrared spectroscopy measurements and DFT calculations

Oriele Palumbo <sup>1</sup>, Adriano Cimini <sup>1</sup>, Francesco Trequattrini <sup>2,1,\*</sup>, Jean-Blaise Brubach <sup>3</sup>, Pascale Roy <sup>3</sup> and Annalisa Paolone <sup>1</sup>

<sup>1</sup> CNR-ISC, U.O.S. La Sapienza, Piazzale A. Moro 5, 00185 Roma, Italy ; oriele.palumbo@roma1.infn.it; annalisa.paolone@roma1.infn.it; cimini.1233261@studenti.uniroma1.it

<sup>2</sup> Physics Department, Sapienza University of Rome, Piazzale A. Moro 5, 00185 Roma, Italy ;

<sup>3</sup> Synchrotron SOLEIL, AILES Beamline, L'Orme des Merisiers Saint-Aubin, BP 48, 91192 Gif-sur-Yvette Cedex, France; pascale.roy@synchrotron-soleil.fr; jean-blaise.brubach@synchrotron-soleil.fr

\* Correspondence: francesco.trequattrini@roma1.infn.it

**Table S1.** Infrared vibrational frequencies ( $\omega$  in cm<sup>-1</sup>) and intensities (I in km/mol) of the four ionic couples calculated at the  $\omega$ B97X-D level of theory with the 6-31G\*\* basis set and a polar medium.

| EMI-MS |        | BMIM-MS |        | EMI-TfO |        | DMEI-TFSI |       |
|--------|--------|---------|--------|---------|--------|-----------|-------|
| ✱      | I      | ✱       | I      | ✱       | I      | ✱         | I     |
| 11     | 17     | 9       | 12.67  | 21      | 7.45   | 26        | 5.35  |
| 26     | 3.06   | 37      | 8.9    | 27      | 0.39   | 30        | 4.72  |
| 58     | 11.93  | 51      | 3.47   | 45      | 12.3   | 37        | 0.44  |
| 65     | 4.49   | 61      | 15.03  | 54      | 3.63   | 41        | 1.22  |
| 86     | 12.18  | 73      | 4.96   | 65      | 2.92   | 48        | 3     |
| 92     | 2.07   | 82      | 1.36   | 76      | 2.95   | 54        | 6.48  |
| 122    | 32.25  | 91      | 1.62   | 103     | 27.46  | 64        | 0.41  |
| 149    | 4.14   | 103     | 0.04   | 113     | 0.83   | 95        | 2.33  |
| 161    | 0.52   | 115     | 27.12  | 145     | 0.34   | 102       | 4.87  |
| 226    | 0.53   | 131     | 0.4    | 171     | 0.25   | 113       | 2.21  |
| 236    | 2.2    | 179     | 1.99   | 207     | 3.61   | 124       | 1.1   |
| 240    | 0.01   | 209     | 1.12   | 214     | 5.63   | 133       | 1.92  |
| 304    | 1.32   | 247     | 0.07   | 236     | 1.2    | 150       | 0.18  |
| 332    | 1.59   | 248     | 1.79   | 240     | 1.81   | 159       | 6.04  |
| 334    | 2.07   | 295     | 0.74   | 313     | 2.85   | 168       | 4.11  |
| 407    | 1.23   | 316     | 3.53   | 320     | 4.06   | 179       | 0.57  |
| 431    | 0.9    | 333     | 1.79   | 345     | 0.65   | 197       | 0.64  |
| 513    | 41.91  | 334     | 2.35   | 348     | 1.76   | 208       | 5.6   |
| 514    | 41.22  | 393     | 1.73   | 400     | 0.89   | 212       | 3.52  |
| 543    | 129.96 | 441     | 4.92   | 442     | 0.93   | 245       | 0.18  |
| 618    | 1.6    | 498     | 5      | 505     | 42.12  | 248       | 0.47  |
| 645    | 11.6   | 513     | 39.61  | 507     | 42.06  | 276       | 2.64  |
| 677    | 49.19  | 515     | 42.67  | 572     | 14.77  | 283       | 15.03 |
| 725    | 6.83   | 546     | 122.2  | 574     | 12     | 297       | 5.95  |
| 770    | 51.29  | 629     | 2.77   | 617     | 18.52  | 301       | 8.17  |
| 778    | 117.9  | 642     | 24.91  | 623     | 306.09 | 325       | 1.89  |
| 815    | 8.2    | 679     | 21.44  | 643     | 28.05  | 330       | 1.5   |
| 891    | 0.04   | 721     | 0.62   | 670     | 31.15  | 334       | 1.79  |
| 933    | 76.44  | 774     | 40.36  | 725     | 6.46   | 346       | 0.34  |
| 977    | 6.63   | 778     | 106.43 | 760     | 45.34  | 349       | 0.84  |

|      |        |      |        |      |        |      |        |
|------|--------|------|--------|------|--------|------|--------|
| 998  | 0.84   | 789  | 25.64  | 776  | 11.04  | 399  | 15.43  |
| 999  | 1.45   | 831  | 9.91   | 818  | 7.65   | 418  | 2.24   |
| 1050 | 248.46 | 869  | 36.6   | 866  | 67.42  | 423  | 18.28  |
| 1056 | 25.18  | 904  | 4.06   | 886  | 0.37   | 497  | 197.57 |
| 1067 | 2.53   | 946  | 9.54   | 978  | 5.94   | 499  | 1.65   |
| 1122 | 14.46  | 975  | 6.97   | 1035 | 288.9  | 525  | 23.87  |
| 1127 | 11.32  | 995  | 0.93   | 1056 | 3.09   | 548  | 6.73   |
| 1135 | 9.77   | 999  | 1.12   | 1068 | 3.88   | 560  | 7.26   |
| 1152 | 1.91   | 1001 | 1.01   | 1121 | 12.27  | 568  | 67.73  |
| 1167 | 16.73  | 1051 | 185.3  | 1126 | 10.06  | 575  | 99.06  |
| 1200 | 249.66 | 1053 | 88.09  | 1136 | 5.33   | 587  | 251.91 |
| 1219 | 360.88 | 1064 | 1.59   | 1153 | 2.66   | 600  | 0.06   |
| 1234 | 530.87 | 1091 | 2.45   | 1169 | 14.34  | 649  | 184.73 |
| 1288 | 4.55   | 1124 | 6.44   | 1209 | 115.84 | 652  | 6.81   |
| 1330 | 0.9    | 1136 | 4.84   | 1226 | 248.47 | 694  | 26.34  |
| 1382 | 25.17  | 1150 | 4.19   | 1228 | 215.27 | 736  | 6.07   |
| 1399 | 19.38  | 1156 | 14.48  | 1258 | 574.6  | 741  | 91.69  |
| 1404 | 8.56   | 1171 | 0.46   | 1265 | 123.2  | 754  | 13.56  |
| 1433 | 10.91  | 1212 | 474.01 | 1274 | 528.54 | 775  | 63.52  |
| 1451 | 3.2    | 1218 | 223.18 | 1287 | 11.98  | 782  | 3.84   |
| 1463 | 6.73   | 1232 | 451.33 | 1329 | 1.21   | 799  | 60.7   |
| 1468 | 7.08   | 1237 | 23.61  | 1398 | 23.15  | 830  | 5      |
| 1469 | 5.25   | 1282 | 3.67   | 1405 | 6.05   | 890  | 0.25   |
| 1490 | 8.63   | 1325 | 5.91   | 1433 | 11.22  | 985  | 7.69   |
| 1490 | 6.91   | 1342 | 0.43   | 1452 | 4.72   | 1009 | 1.06   |
| 1498 | 15.71  | 1381 | 7.61   | 1470 | 7.36   | 1053 | 600.1  |
| 1499 | 13.5   | 1382 | 25.06  | 1490 | 4.7    | 1061 | 22.79  |
| 1513 | 12.12  | 1394 | 7.91   | 1495 | 6.56   | 1093 | 2.69   |
| 1520 | 13.06  | 1412 | 1.73   | 1498 | 16.71  | 1107 | 15.96  |
| 1640 | 63.19  | 1416 | 14.03  | 1500 | 15.5   | 1127 | 2.08   |
| 1650 | 71.26  | 1436 | 5.43   | 1520 | 12.17  | 1134 | 14.14  |
| 3074 | 17.04  | 1454 | 13.15  | 1520 | 16.75  | 1142 | 596.99 |
| 3100 | 3.1    | 1467 | 5.05   | 1644 | 40.48  | 1148 | 706.98 |
| 3100 | 29.39  | 1468 | 5.16   | 1651 | 95.57  | 1161 | 7.04   |
| 3129 | 16.14  | 1474 | 7.64   | 3077 | 17.14  | 1175 | 42.68  |
| 3162 | 5.42   | 1484 | 17.43  | 3101 | 23.02  | 1246 | 590.61 |
| 3175 | 23.73  | 1485 | 11.14  | 3131 | 15.29  | 1246 | 12.29  |
| 3194 | 13.72  | 1491 | 9.82   | 3164 | 9.24   | 1250 | 131.27 |
| 3204 | 3.56   | 1497 | 3.08   | 3177 | 19.02  | 1255 | 446.23 |
| 3207 | 4.44   | 1507 | 5.94   | 3197 | 9.41   | 1259 | 77.25  |
| 3213 | 2.87   | 1513 | 17.37  | 3203 | 1.89   | 1262 | 296.01 |
| 3215 | 4.37   | 1518 | 28.84  | 3216 | 2.01   | 1267 | 42.58  |
| 3234 | 340.38 | 1522 | 8.01   | 3311 | 145.83 | 1279 | 31.88  |
| 3325 | 18.12  | 1649 | 32.98  | 3335 | 19.38  | 1333 | 181.55 |
| 3344 | 10.73  | 1654 | 102.26 | 3352 | 9.54   | 1335 | 28.23  |
|      |        | 3056 | 49.28  |      |        | 1345 | 629.24 |
|      |        | 3061 | 32.81  |      |        | 1402 | 28.64  |
|      |        | 3077 | 21.82  |      |        | 1413 | 16.65  |
|      |        | 3098 | 3.22   |      |        | 1428 | 9.66   |
|      |        | 3105 | 32.98  |      |        | 1440 | 14.31  |
|      |        | 3109 | 19.2   |      |        | 1443 | 6.14   |

|      |        |      |        |
|------|--------|------|--------|
| 3121 | 9.11   | 1463 | 51.77  |
| 3134 | 37.16  | 1475 | 8.2    |
| 3137 | 88.55  | 1485 | 5.24   |
| 3150 | 52.2   | 1499 | 18.86  |
| 3188 | 3.98   | 1500 | 2.18   |
| 3206 | 3.26   | 1505 | 21.93  |
| 3206 | 5.44   | 1512 | 7.74   |
| 3211 | 5.26   | 1530 | 29.3   |
| 3225 | 5.24   | 1589 | 17.66  |
| 3227 | 300.16 | 1610 | 132.58 |
| 3337 | 47.46  | 1663 | 28.38  |
| 3343 | 4.69   | 3082 | 11.24  |
|      |        | 3097 | 2.7    |
|      |        | 3111 | 19.21  |
|      |        | 3130 | 16.85  |
|      |        | 3170 | 6.56   |
|      |        | 3174 | 19.29  |
|      |        | 3182 | 0.71   |
|      |        | 3192 | 16.43  |
|      |        | 3200 | 1.21   |
|      |        | 3209 | 2.34   |
|      |        | 3222 | 1.52   |
|      |        | 3339 | 18.07  |
|      |        | 3360 | 12.42  |

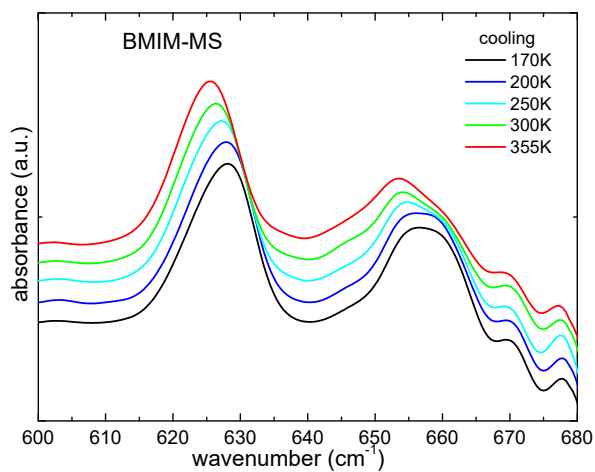

**Figure S1.** Absorbance of BMIM-MS between 600 and 680  $\text{cm}^{-1}$  measured upon cooling.

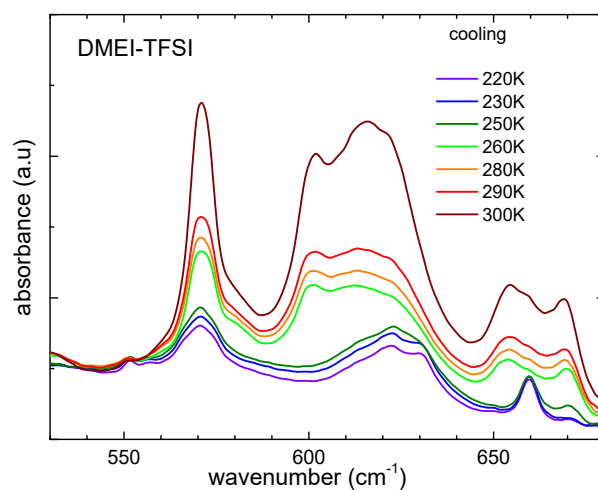

**Figure S2.** Absorbance of DMEI-TFSI between 530 and 680  $\text{cm}^{-1}$  measured upon cooling.

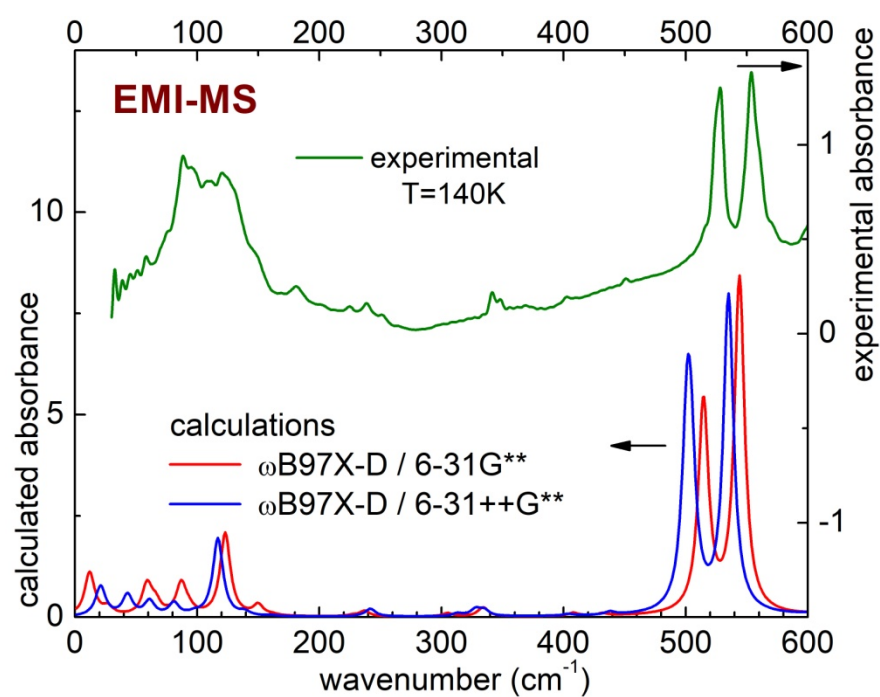

**Figure S3.** Comparison of the experimental absorption spectrum of EMI-MS measured at 140 K with the absorbance spectra calculated by DFT at the  $\omega\text{B97X-D/6-31G}^{**}$  and  $\omega\text{B97X-D/6-31++G}^{**}$  levels.

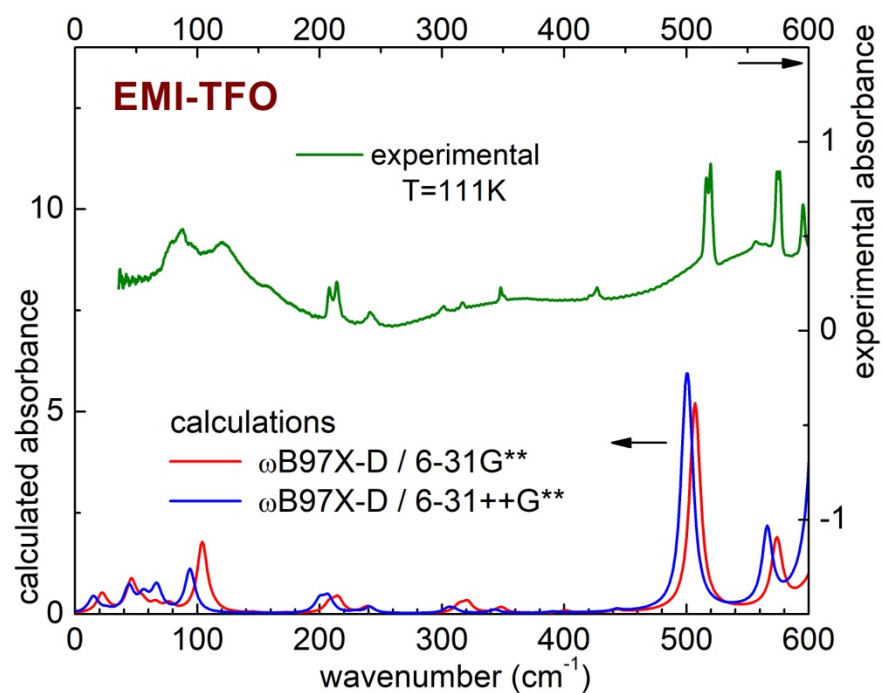

**Figure S4.** Comparison of the experimental absorption spectrum of EMI-TFO measured at 111 K with the absorbance spectracalculated by DFT at the  $\omega$ B97X-D/6-31G\*\* and  $\omega$ B97X-D/6-31++G\*\* levels.

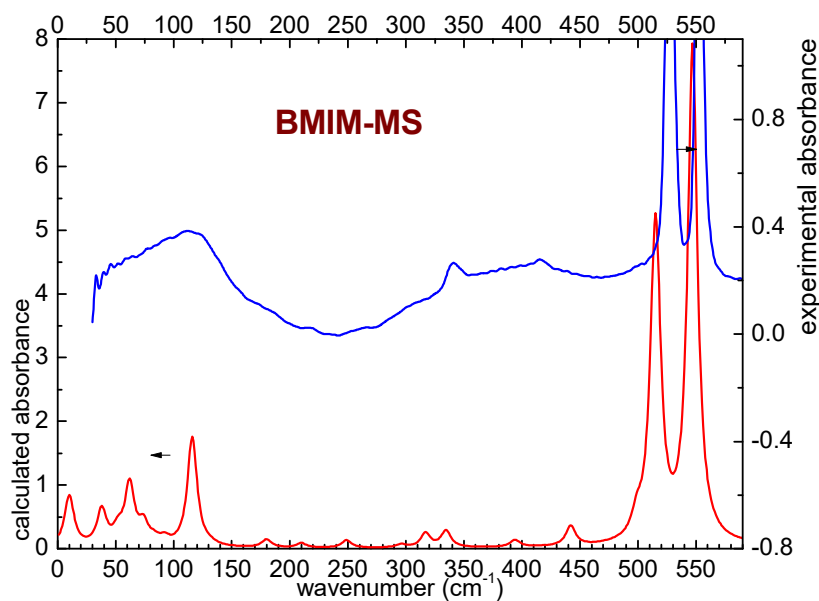

**Figure S5.** Comparison of the experimental absorption spectrum of BMIM-MS measured at 300 K with the absorbance spectrum calculated by DFT at the  $\omega$ B97X-D/6-31G\*\* level.

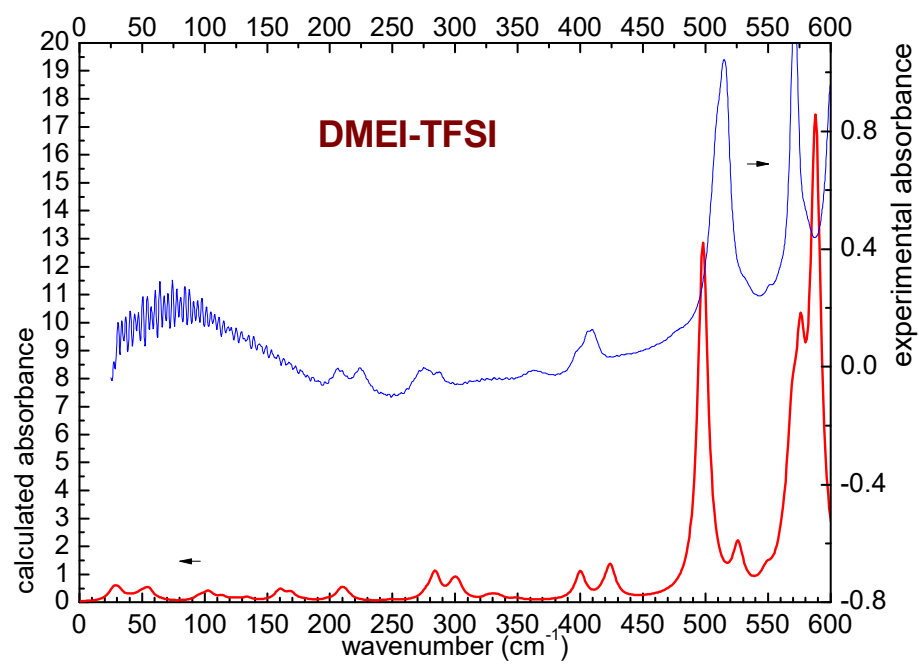

**Figure S6.** Comparison of the experimental absorption spectrum of DMEI-TFSI measured at 300 K with the absorbance spectrum calculated by DFT at the  $\omega$ B97X-D/6-31G\*\* level.
